1 **The role of Construction of Healthcare Consortium on the allocation of human resources for**  
2 **primary care resources and its equity in China**

3 Shijie Li<sup>1</sup> (Current graduate student), Changze Liao<sup>1</sup> (Current graduate student), Shengli Zhang<sup>1\*</sup> (MSc)

4 <sup>1\*</sup> School of Humanities and Management in Fujian University of Traditional Chinese Medicine, Fuzhou, Fujian 350012, China.

5 \*Corresponding author(s). E-mail(s): shenglizhang616@sina.com;

6

7

## Abstract

8 Objectives: This study aims to measure the effect of Construction of Healthcare Consortium (CHC) on the allocation and equity of human resources (HR) for primary health  
9 care (PHC) in China, at the same time, it provides some data to support the government's policies improvement in the next stage. Methods: Changes in the equity of allocation  
10 of HR for PHC by population are demonstrated through a three-stage approach to inequality analysis that includes the Gini coefficient (G), the Theil index (T), the concentration  
11 index (CI) and concentration curve. The GM(1,1) model is used to project the trend of resources from 2021 to 2030. Results: Volume of HR for PHC accelerates at an average  
12 rate of growth following the release of CHC in the 2016. whilst some regions have seen their G and T rise between 2012 and 2016, their levels of inequality of allocation for  
13 resource shave gradually declined in the years following 2016, but there are exceptions, with the regions of northeast and northwest seeing the opposite. Eastern and northern  
14 region account for a larger contribution to intra-regional inequality. Concentration indices and concentration curves indicate that HR for PHC is related to economic income  
15 levels. GM (1, 1) projects an increasing trend in resources from 2021 to 2030, but with variations in average growth rates in different regions. Conclusions: The inequality of  
16 human resources for primary health care in China is low, however, the inequality between regions has not been eliminated. We still need to take a long-term view to monitor  
17 the impact of CHC on the allocation of HR for PHC and its equity in China.

18 Keywords: Primary health care, Human resources, Equity, Healthcare Consortium

## 19 1 Introduction

20 Equity in population health is an important component of social equity [**Error! Reference source not found.**], yet it cannot be ignored that inequities in population health are  
21 still widespread around the world, not only in most developing countries, but also in many developed countries [2-4]. If we want to solve the inequality in population health,  
22 how to realize the rational distribution of health resources in different regions and different income groups from a multidimensional perspective will become particularly  
23 important, because it is one of the important links to improve the inequality in population health [5].

24 It can be argued that primary health care (PHC) system is the cornerstone of the effective functioning of health systems worldwide [6] and is recognized as the most cost-  
25 effective strategy for improving the health of populations[7,8]. After the market-oriented reform of Chinese health care system at the end of the last century, the potential of  
26 PHC's system in China was suppressed for a long period of time, and instead tertiary comprehensive health care institutions overcrowded with patients and health care resources  
27 [9]. The operational efficiency of Chinese health care system was compromised by this irrational structure of supply and demand for health services, which also exacerbated  
28 population health inequalities to some extent [10]. In 2009, State Council of China launched a new round of healthcare reform to improve the irrationality of Chinese health  
29 care system [11]. In 2015, Hierarchical Diagnosis and Treatment System (HDTS) adapted to China's national conditions was explicitly proposed and regarded as an effective  
30 way to realize the new healthcare reform [12]. HDTS strongly emphasizes the place of PHC in improving health equity for populations. Therefore, in order to better implement  
31 the strategy of HDTS, as well as to activate the vitality of PHC more vigorously, China National Health Commission put forward a policy called Guiding Opinions on Carrying  
32 Out Pilot Construction of Healthcare Consortia (CHC) in 2016 [13]. One of the objectives of this policy is to improve the scarcity and unequal allocation of PHC's resources

33 in the past, by directing more and better health care resources, especially human resources (HR) for PHC. Taking 2016 as a starting point, this strategy has been implemented  
34 for some time, and it is now time to assess their effectiveness. We want to know if it has had a positive impact on the resourcing and equity of PHC, as it sets out to do.

35 Reviewing the previous studies, Gini coefficient (G), Concentration index (CI) and Concentration curves, Thiel index (T), index of degree of health resource agglomeration  
36 (HRAD), etc. were employed in many studies in evaluating the configuration and inequality of health resources [**Error! Reference source not found.**,14,15]. In addition to  
37 assessing equity, Zhang also assessed the efficiency of resource allocation in PHC from an input-output perspective [16]. Some scholars have also analyzed the extent to which  
38 the distribution of health resources was spatially equitable in terms of geographic accessibility [17]. In addition, there are studies that show possible future trends in health  
39 resources through predictive modeling, the results of which may often be able to guide the work of the government to some extent [18,19].

40 Based on a review and summary of the literature, we chosen the five years before and after the release of policy of CHC as the time period for our study, focused on changes  
41 in the allocation of HR for PHC by population and its equity in China. Changes are demonstrated through a three-stage approach to inequality analysis. In the first phase, G  
42 was used to measure inequality over time in the allocation of HR for PHC by population; the second stage was to compute T to explore the root of inequality; CI was employed  
43 to understand whether resources tend to be allocated to areas with lower or higher incomes, in third stage. It is noteworthy that scientific predictive values are of real value for  
44 policy improvement, yet relatively few studies have been conducted in the past to predict HR for PHC. Therefore, we adopted GM(1,1) model in order to make up for the lack  
45 of this research content to a certain extent. This study aims to measure the effect of CHC on the allocation and equity of HR in PHC, at the same time, it provides some real

46 data to support the government's policies improvement in the next stage.

## 47 **2 Methods**

### 48 **2.1 Data resources and region division**

49 The original data on HR in PHC used in our study were obtained from the China Health Statistics Yearbook (2013-2022) (this yearbook collects data from the year prior to the  
50 year in which it was published. Its former name includes China Health and Family Planning Statistics Yearbook (2016-2017)) [20]. Data about year-end population size and  
51 GDP per capita by province were from the China Statistical Yearbook (2013-2022) [21]. Hong Kong, Macao and Taiwan were not included in this study due to missing data.

52 We divided China into six economic zones, which take into account the geographical location and economic characteristics of each province. Beijing, Tianjin, Hebei, Shanxi  
53 and Inner Mongolia are included in the north region; Liaoning, Jilin and Heilongjiang are divided into the northeast region; Shanghai, Jiangsu, Zhejiang, Anhui, Fujian, Jiangxi  
54 and Shandong belong to the eastern region; the south-central region includes Henan, Hubei, Hunan, Guangdong, Guangxi and Hainan; the southwest region consists of  
55 Chongqing, Sichuan, Guizhou, Yunnan and Tibet; Shaanxi, Gansu, Qinghai, and Ningxia are grouped together as the northwest region. The division of the six economic regions  
56 and their GDP per capita in 2021, and some basic information about the healthcare consortium owned by them are shown in the Figure 1.

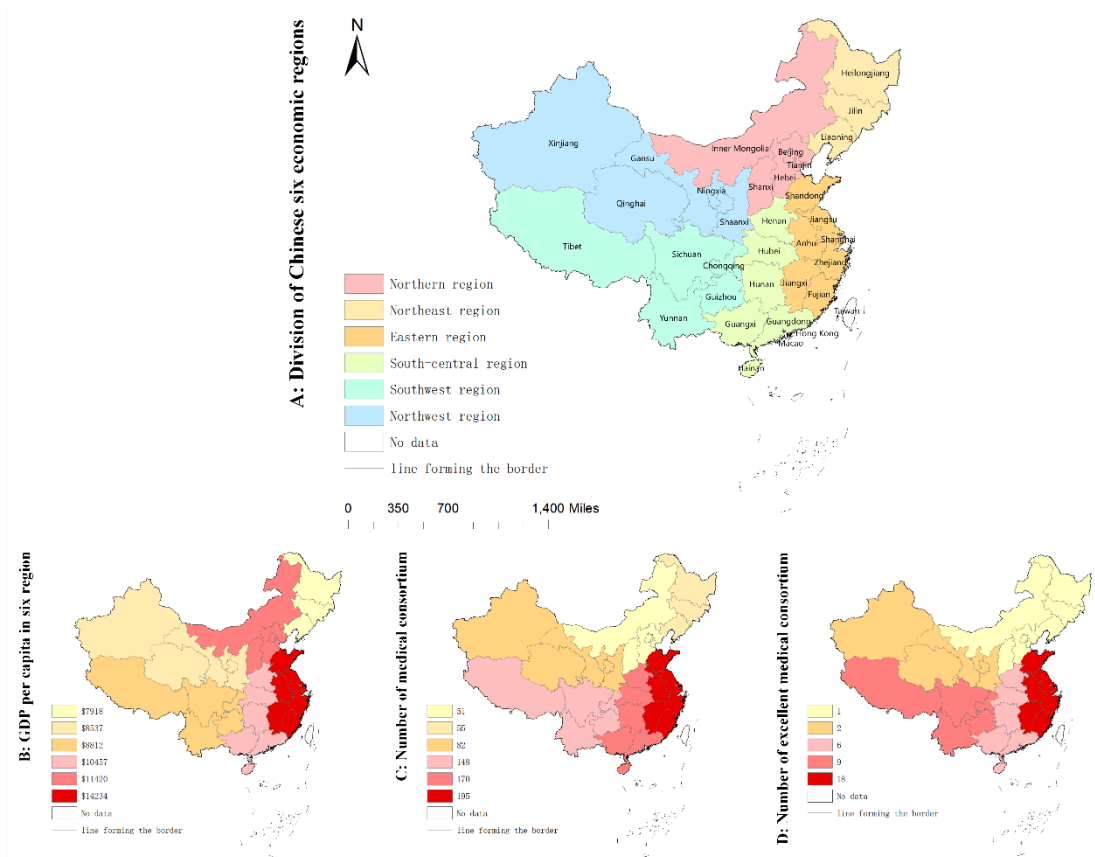

57

58 **Fig. 1** The division of Chinese six economic regions and basic information about them. A shows the six economic regions of China. B shows the GDP per capita of the six regions in 2021. C

59 show the number of pilot sites for medical consortium owned by the six regions in 2019, and D shows the number of medical consortiums owned by the six regions that were rated as excellent

60 in 2021

61

## 62 **2.2 Indicators**

63 Based on the literature review [1,14], three indicators containing health technical personnel, practicing physicians, and registered nurses were selected to assess the allocation  
64 of HR in PHC. The reference for the inclusion exclusion criteria of the indicators is the China Health Statistics Yearbook [20].

## 65 **2.3 Gini coefficient (G)**

66 The Gini coefficient, derived from the Lorenz curve, is one of the classic indicators used internationally to measure the degree of inequality in the wealth of the inhabitants of  
67 a country or region. G is also often utilized as a measure of equity in the distribution of health resources [14,22]. G is in the range of 0 to 1,  $G < 0.2$  denotes absolute fairness;  
68  $0.2 \leq G < 0.3$  indicates relative balance;  $0.3 \leq G < 0.4$  means basically reasonable;  $0.4 \leq G$  represents a relatively high level of inequality;  $0.5 < G$  reflects a large inequality gap [23].

69 Thus, scholars generally consider the grading of the Gini coefficient to be 0.4 is a "cordon sanitaire" for unequal allocation of health resources. G is calculated according to the  
70 following formula:

$$71 \quad G = 1 - \sum_{i=1}^n (X_i - X_{i-1})(Y_i + Y_{i-1}) \quad (1)$$

72 In the above equation,  $X_i$  is used to represent the proportion of the population in area of  $i$  to the overall population size, and  $Y_i$  is used to denote the amount of HR for PHC

73 in area of  $i$  as a proportion of the total amount of these resources.

#### 74 **2.4 Theil index (T)**

75 Inequality can also be measured by using the Thiel Index. T has the advantage of breaking down the results into variability between components and variability within  
76 components, so that the root causes of inequity can be further located. T has a value between 0 and 1, with smaller values representing greater inequity in different regions. The  
77 T is between 0 and 1, with smaller T representing lower levels of inequality in different regions [26]. The formula for T is as follows:

$$78 \quad T = \sum_{i=1}^n P_i \ln \frac{P_i}{Y_i} \quad (3)$$

79 In Eq. (3),  $P_i$  is the population of region  $i$  as a percentage of the total population, and  $Y_i$  is the HR for PHC in region  $i$  as a percentage of total resources. T can be further  
80 decomposed into  $T_{intra}$  representing intra-regional differences and  $T_{inter}$  indicating inter-regional differences, the details are as follows:

$$81 \quad T = T_{intra} + T_{inter} \quad (4)$$

$$82 \quad T_{intra} = \sum_{g=1}^k P_g \ln \frac{P_g}{Y_g} \quad (5)$$

$$83 \quad T_{inter} = \sum_{g=1}^m P_g T_g \quad (6)$$

84 In Eq. (5) and (6),  $g$  is used as a proxy for the grouping of the six regions;  $P_g$  is utilized to denote the proportion of the regional population to the national population; and the  
85 proportion of HR of PHC possessed by the districts to the total national resources is denoted by  $Y_g$ ;  $m$  is employed to represent the total number of provinces included within



86 the region; T for each region is denoted by  $T_g$  [Error! Reference source not found.,14,19]. The values of  $T_{intra}/T$  and  $T_{inter}/T$  are referred to percentage contribution to  
87 inequality, by which we can tell whether differences in equity originate between or within regions.

## 88 2.5 Concentration index (CI) and Concentration curve

89 The concentration index is an evolution of G, through which it is possible to assess the degree of equity in the allocation of health resources under different economic conditions  
90 [24]. Concentration curves, on the other hand, are developed from Lorentz curves. There are two ways to calculate CI: Methods of covariance and geometric. The covariance  
91 method is computed as follows:

$$92 \quad CI = \frac{2}{\mu} cov(h,r) \quad (2)$$

93 In Eq. (2),  $r$  is defined as the ordering of GDP per capita,  $h$  is used as the ordering of the amount of health resources, and  $\mu$  is represented as the mean amount of HR in PHC.

94 In our research, we optioned the geometric method to compute CI, which has the same formula and computational steps as G. However, there are some differences between  
95 the concentration curves and Lorentz curves, in that the X and Y axes of the concentration curves correspond to the cumulative percentage of population and the cumulative  
96 percentage of HR in PHC after sorting by GDP per capita, respectively. The value of CI ranges from -1 to 1, the closer the absolute value of CI, the better the fairness is. When  
97 the CI is negative, the concentration curve appears above the absolute equity line, which implies that more of HR for PHC tend to be allocated to low-income areas. In contrast,  
98 it means that more of HR for PHC tend to be allocated to higher-income regions.

99 **2.6 Gray predictive model GM ( 1,1 )**

100 GM(1,1) is to establish a first-order continuous differential equation with a time series as the independent variable to predict the future trend of a dependent variable [27,28].

101 This method has the advantage of long-term forecasting and has been applied to forecast trends in human resources for health care [19]. Our study drew on the computational

102 process of GM(1,1) used by Ruxin Kou [19]. First, the construction of the accumulation matrix and the constant vector are constructed by accumulating the original data

103 sequences. Next, the endogenous control gray level  $u$  and the development coefficient  $a$  are calculated. The model equations are then constructed:

104 
$$\hat{x}^{(1)}(k) = \left(x^{(0)} - \frac{a}{u}\right)e^{-a(k-1)} + \frac{a}{u} \quad (7)$$

105 In Eq. (7),  $x^{(0)}$  represents the original sequence,  $\hat{x}^{(1)}$  refers to the cumulative sequence that is the original sequence, and  $k$  is the time series. After the model is constructed,

106 by using a posteriori error ratio  $C$  and small error probability  $P$  its accuracy will be tested, model accuracy is graded as in Table 1.

107 **Table 1** Model accuracy grading scale

---

| Predictive accuracy class | posterior variance ratio (C) | posterior probability (P) |
|---------------------------|------------------------------|---------------------------|
| Superior                  | $\leq 0.35$                  | $\geq 0.95$               |
| Qualified                 | $0.35 < C \leq 0.50$         | $0.80 \leq P < 0.95$      |
| Marginal                  | $0.50 < C \leq 0.65$         | $0.70 \leq P < 0.80$      |
| Disqualified              | $> 0.65$                     | $< 0.70$                  |

---

108 **3 Results**

109 **3.1 Temporal changes of the allocation of human resources for primary health care in China from 2012 to 2021**

110 Comparing the three major years, we can visualize that the number of HR for PHC is increasing in both nation and the six economic regions (Table 2). The fastest average rates  
111 of growth for health technical personnel and registered nurses are in the Southwest at 6.33% and 11.74% respectively, and practicing physicians is in the Northern at 5.49%  
112 (Table 3). Using 2016 as the cut-off point, we compared the average rate of growth in HR for PHC per 1,000 capita in the six regions over the two phases and were surprised  
113 to find that the average rate of growth from 2016 to 2021 was significantly higher than that from 2012 to 2016, the average rates of growth of health technical personnel,  
114 practicing physicians, and registered nurses in the latter period were 4.01 percentage points, 4.79 percentage points, and 4.18 percentage points higher than in the former period  
115 respectively.

116 **Table 2** Total and per 1,000 capita of HR of PHC in three major years

| Year | Region        | Health technical personnel |                 | Practicing physicians |                 | Registered nurses |                 |
|------|---------------|----------------------------|-----------------|-----------------------|-----------------|-------------------|-----------------|
|      |               | Total                      | Per 1000 capita | Total                 | Per 1000 capita | Total             | Per 1000 capita |
| 2012 | Northern      | 253966                     | 1.51            | 140717                | 0.83            | 56411             | 0.33            |
|      | Northeast     | 152305                     | 1.39            | 78044                 | 0.71            | 41168             | 0.38            |
|      | Eastern       | 634231                     | 1.60            | 302065                | 0.76            | 169769            | 0.43            |
|      | South-central | 578866                     | 1.52            | 278967                | 0.73            | 153841            | 0.40            |
|      | Southwest     | 273444                     | 1.40            | 144066                | 0.74            | 64809             | 0.33            |
|      | Northwest     | 158939                     | 1.62            | 65708                 | 0.67            | 42180             | 0.43            |
|      | National      | 2051751                    | 1.52            | 1009567               | 0.75            | 528178            | 0.39            |
| 2016 | Northern      | 278529                     | 1.60            | 156344                | 0.90            | 69758             | 0.40            |
|      | Northeast     | 156160                     | 1.43            | 78900                 | 0.72            | 44567             | 0.41            |
|      | Eastern       | 727078                     | 1.79            | 355983                | 0.88            | 221479            | 0.55            |
|      | South-central | 683057                     | 1.75            | 328067                | 0.84            | 209849            | 0.54            |
|      | Southwest     | 330167                     | 1.65            | 153139                | 0.77            | 96571             | 0.48            |
|      | Northwest     | 179439                     | 1.78            | 72975                 | 0.72            | 53557             | 0.53            |
|      | National      | 2354430                    | 1.71            | 1145408               | 0.83            | 695781            | 0.50            |
| 2021 | Northern      | 398275                     | 2.36            | 227831                | 1.35            | 116552            | 0.69            |
|      | Northeast     | 200940                     | 2.07            | 104856                | 1.08            | 68191             | 0.70            |
|      | Eastern       | 1047505                    | 2.46            | 521961                | 1.23            | 366365            | 0.86            |
|      | South-central | 928674                     | 2.26            | 438876                | 1.07            | 339790            | 0.83            |

| Year | Region    | Health technical personnel |                 | Practicing physicians |                 | Registered nurses |                 |
|------|-----------|----------------------------|-----------------|-----------------------|-----------------|-------------------|-----------------|
|      |           | Total                      | Per 1000 capita | Total                 | Per 1000 capita | Total             | Per 1000 capita |
|      | Southwest | 499948                     | 2.44            | 222012                | 1.08            | 185181            | 0.90            |
|      | Northwest | 226257                     | 2.19            | 99437                 | 0.96            | 73800             | 0.71            |
|      | National  | 3301599                    | 2.34            | 1614973               | 1.14            | 1149879           | 0.82            |

117 **Table 3** Average rate of growth of HR for PHC Per 1000 capita by phase

| region        | Health technical personnel |           |           | Practicing physicians |           |           | Registered nurses |           |           |
|---------------|----------------------------|-----------|-----------|-----------------------|-----------|-----------|-------------------|-----------|-----------|
|               | 2012-2016                  | 2016-2021 | 2012-2021 | 2012-2016             | 2016-2021 | 2012-2021 | 2012-2016         | 2016-2021 | 2012-2021 |
| Northern      | 1.54%                      | 8.06%     | 5.11%     | 1.87%                 | 8.47%     | 5.49%     | 4.63%             | 11.48%    | 8.38%     |
| Northeast     | 0.77%                      | 7.61%     | 4.52%     | 0.42%                 | 8.31%     | 4.73%     | 2.15%             | 11.40%    | 7.19%     |
| Eastern       | 2.89%                      | 6.60%     | 4.93%     | 3.60%                 | 6.97%     | 5.46%     | 6.27%             | 9.58%     | 8.10%     |
| South-central | 3.55%                      | 5.24%     | 4.48%     | 3.46%                 | 4.90%     | 4.25%     | 7.37%             | 8.98%     | 8.26%     |
| Southwest     | 4.17%                      | 8.09%     | 6.33%     | 0.90%                 | 7.15%     | 4.33%     | 9.79%             | 13.32%    | 11.74%    |
| Northwest     | 2.29%                      | 4.21%     | 3.35%     | 1.87%                 | 5.84%     | 4.06%     | 5.34%             | 6.07%     | 5.75%     |
| National      | 2.99%                      | 6.47%     | 4.91%     | 2.57%                 | 6.55%     | 4.76%     | 6.41%             | 10.40%    | 8.61%     |

118 **3.2 Equity analysis of human resource allocation for Chinese primary health care based on a three-stage approach**

119 **3.2.1 Results of the Gini coefficient**

120 The change in G of HR for PHC is shown in Figure 3. At the national level and in the six regions, the G of HR for PHC in the three main years is less than 0.2, and based on

121 this result it can be assumed that there is a good level of equality of allocation for resources. By comparing G from 2012 to 2016 with that from 2016 to 2021 we find that while

122 some regions, such as regions of eastern and south-central, saw their G rose between 2012 and 2016, their inequality levels gradually declining in the years after 2016. There  
 123 are exceptions, however, the opposite is true in regions of northeast and northwest, where G shown an upward trend in both regions.

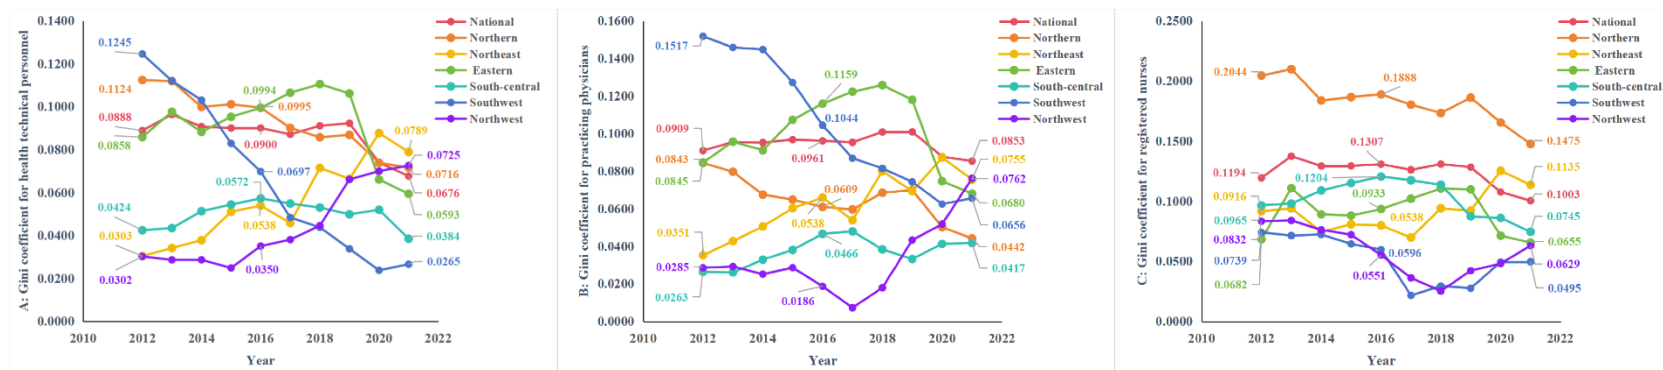

124  
 125 **Fig. 2** The G of HR for PHC from 2012 to 2021. **A**, **B**, and **C** show the G of health technical personnel, practicing physicians, registered nurses respectively.

126 **3.2.2 Results of the Theil index**

127 The results of analyzing equity through the T are shown in Figure 3, which is essentially the same as the analysis of G. At the same time, Table 4 further shows us the root of  
 128 the current inequality in allocation of HR for PHC in the country as a whole. It was the intra-regional differences that contributed more to the overall level of inequality in  
 129 2021. The percentage contribution of the six regions to intra-region inequality was further calculated, and in Figure 4 it can be observed intuitively that the eastern accounted  
 130 for the highest percentage of intra-region inequality for health technical personnel and practicing physicians, and the northern accounted for the highest percentage of intra-

131 region inequality for registered nurses. Figure 5 shows the allocation of HR for PHC per 1,000 capita in province in 2021, we can find the reason that the eastern contributed  
 132 more to the intra-region inequality in configuration of health technical personnel and practicing physicians is that it had both the province with the higher level of allocation  
 133 and the province with the lowest level of allocation, and the same is true for the northern.

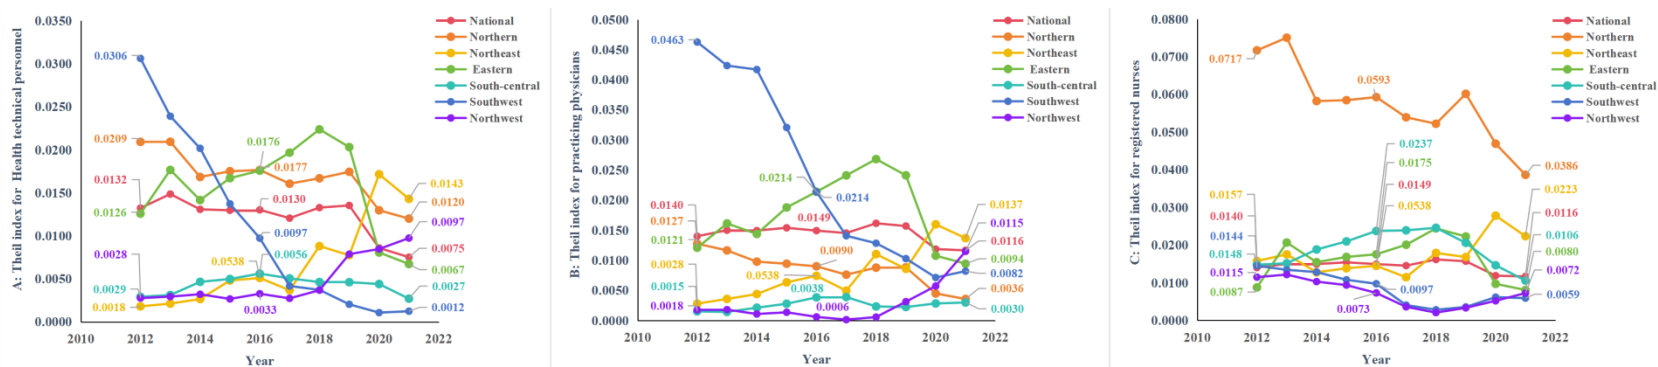

134  
 135 **Fig. 3** The T of HR for PHC from 2012 to 2021. A, B, and C show the T of health technical personnel, practicing physicians, registered nurses respectively

136 **Table 4** Percentage of inter-regional and intra-regional contributions to T in 2021

| Project      | Health technical personnel | Practicing physicians | Registered nurses |
|--------------|----------------------------|-----------------------|-------------------|
| Inter-Region | 18%                        | 39%                   | 25%               |
| Intra-Region | 82%                        | 61%                   | 75%               |

137

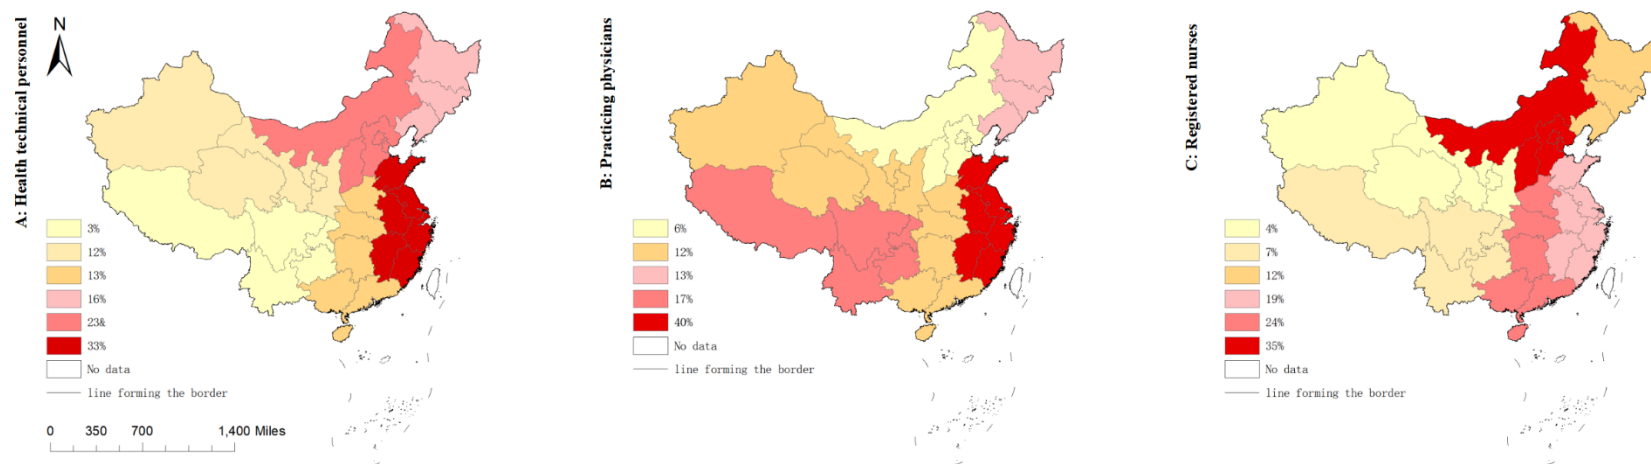

138

139 **Fig. 4** Percentage contribution of the six regions to intra-regional inequality in 2021. **A**, **B**, and **C** correspond respectively to health technical personnel, practicing physicians, registered nurses

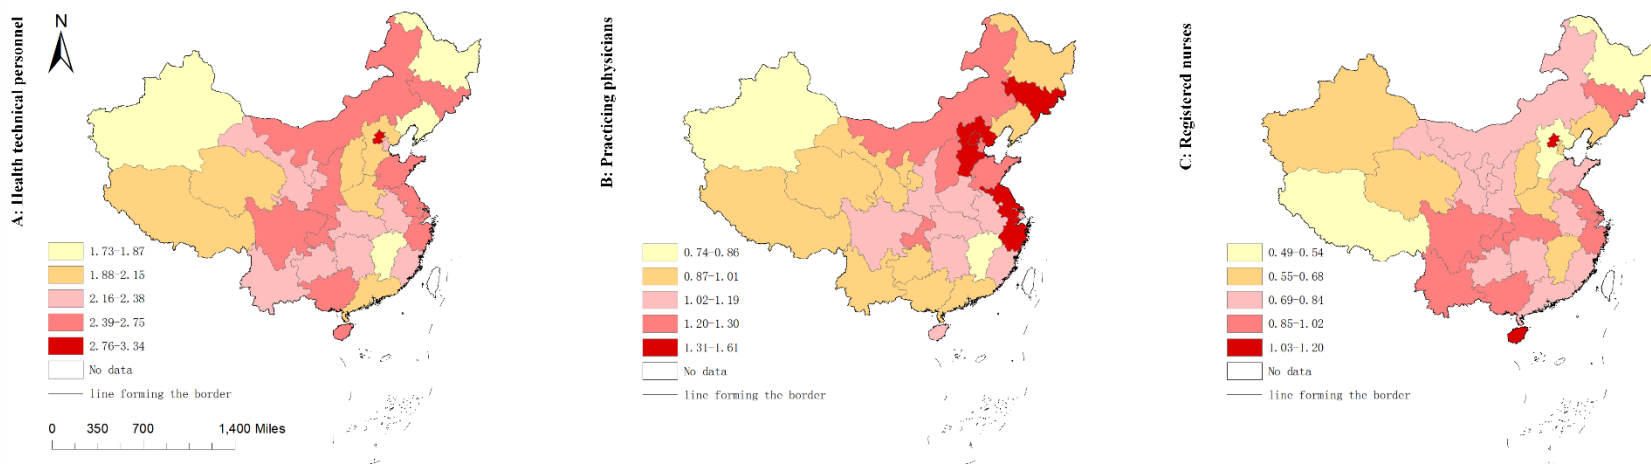

140



141 **Fig. 5** Number of HR for PHC per 1,000 capita in the six regions in 2021. A, B, and C correspond respectively to health technical personnel, practicing physicians, registered nurses

### 142 **3.2.3 Results of the Concentration index and Concentration curve**

143 The absolute value of the concentration index for all HR for PHC is less than 0.2, indicating a low level of inequality in the allocation of these resources. in concrete terms, in  
144 2012, the overall national CI for health technical personnel, practicing physicians and registered nurses were 0.0407, 0.0458 and 0.0568 respectively. By 2016, their CI increased  
145 slightly to 0.0484 for health technical personnel, 0.0594 for practicing physicians, and 0.0657 for registered nurses. But by 2021, their CI have all declined to 0.0302 for health  
146 technical personnel, 0.0280 for practicing physicians and 0.0486 for registered nurses respectively. In Figure 6, the changes of inequality in three major years can be seen more  
147 visually, with the concentration curves for all resources deviating slightly more outward from the absolute equity curve in 2016 than in 2012, which represents a decrease in  
148 their degree of equity between 2012 and 2016. In contrast, the concentration curves for all resources in 2021 were closer inward to the absolute equity curves than they were in  
149 2016, which suggests a change for the better in their equity between 2016 and 2021, and by a comparison of value of CI, equity becomes more improving in 2021 than it was  
150 in 2012. What can also be observed from the Figure 6 is that the concentration curve of resources in all years lies below the line of absolute equity, which indicates these  
151 resources are more skewed in favor of being allocated to areas with better economic incomes.

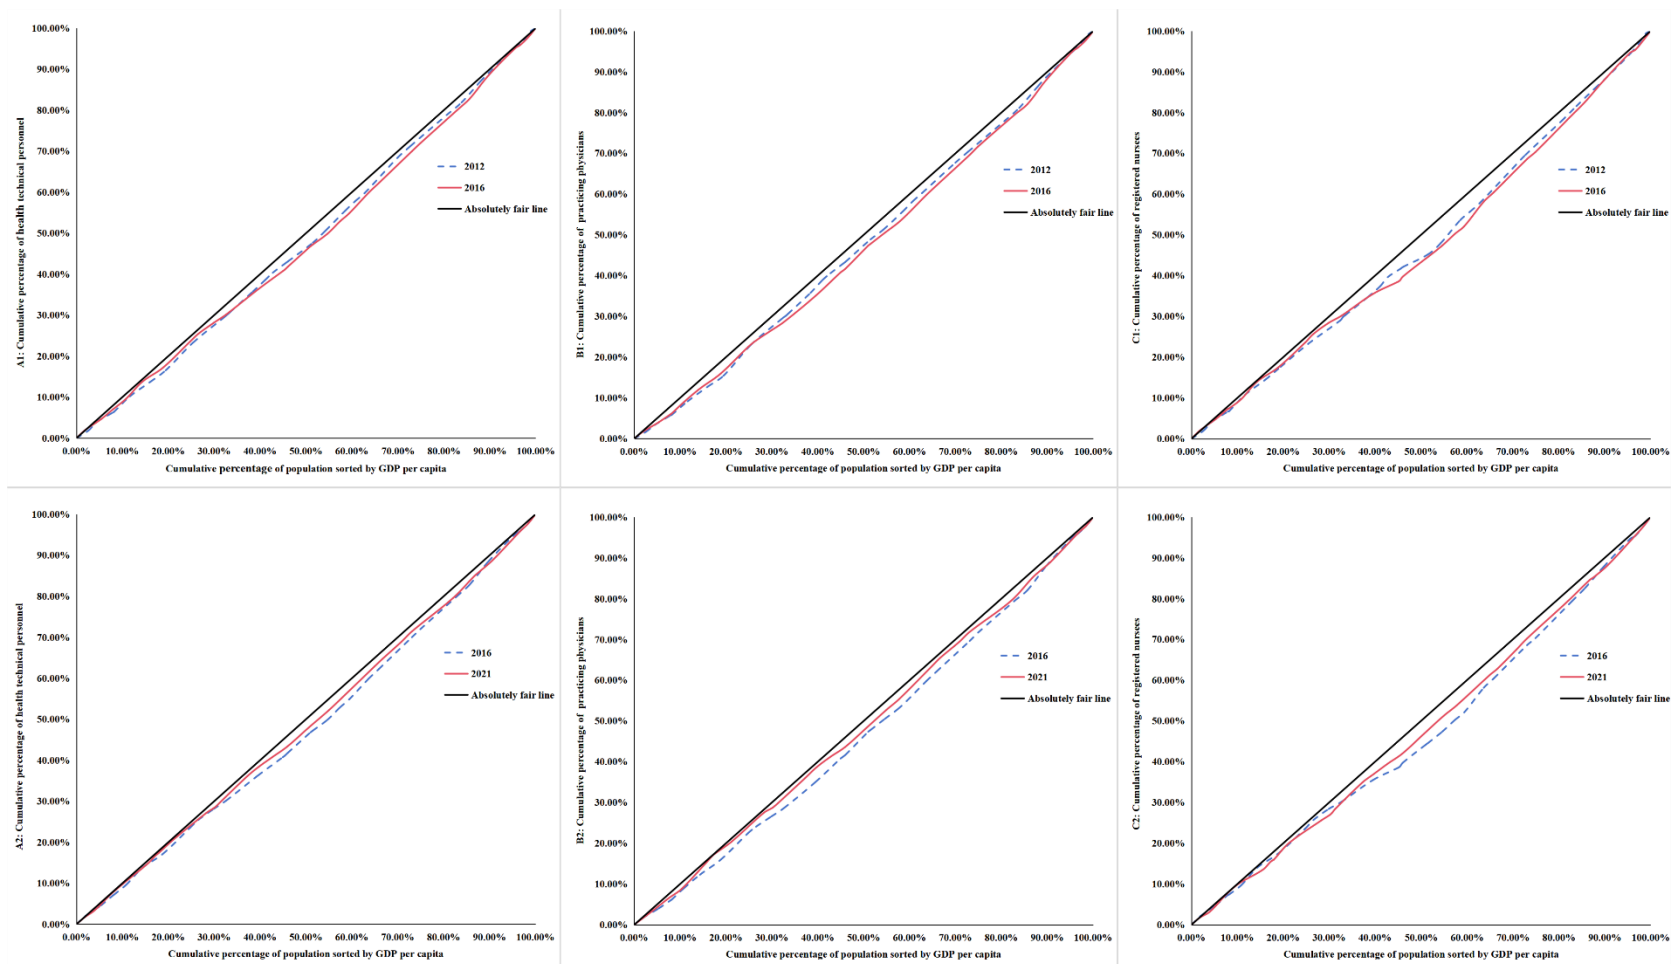

152

153 **Fig. 6** Concentration curve of HR for PHC, 2012 vs. 2016 and 2016 vs. 2021. **A1, B1,** and **C1** show the concentration curve of health technical personnel, practicing physicians, registered

154 nurses respectively, 2012 vs. 2016. **A2**, **B2**, and **C2** show the concentration curve of health technical personnel, practicing physicians, registered nurses respectively, 2016 and 2021.

### 155 3.2.4 Forecasting results of human resources for Chinese primary health care through GM ( 1 , 1 ) model

156 In this section, we first predicted the total amount of primary health care resources at the national level and in the six districts by constructing a GM(1,1) model. The  
157 information underlying the constructed model and the accuracy tests are displayed in Table 5. In the second step, we referred to the data of projected population of Chinese  
158 provinces from 2022 to 2030 under the scenario of low fertility accompanied by stable migration in findings of Zhang's study [30], and combined with the first step, we  
159 projected the amount of HR for PHC per 1,000 capita from 2022 to 2030, which is presented in Figure 7. HR for PHC show a growing trend, with health technical personnel,  
160 practicing physicians and registered nurses per 1,000 capita reaching 3.88, 1.91 and 1.84 in 2030, but at the same time, we also find that although the total amount of  
161 resources in each region is increasing, there are differences in the average rate of growth in each region (Fig. 8).

162 **Table 5** Basic information and value of accuracy test about GM (1,1) model

| Project                    | Region           | Development coefficients $a$ | Endogenous control gray numbers $u$ | Test statistic C | P-value |
|----------------------------|------------------|------------------------------|-------------------------------------|------------------|---------|
| Health technical personnel | Northern region  | -0.061                       | 218280                              | 0.133            | 1.000   |
|                            | Northeast region | -0.039                       | 135194                              | 0.244            | 1.000   |
|                            | Eastern region   | -0.061                       | 573413                              | 0.187            | 1.000   |

| Project               | Region               | Development coefficients $a$ | Endogenous control gray numbers $u$ | Test statistic $C$ | P-value |
|-----------------------|----------------------|------------------------------|-------------------------------------|--------------------|---------|
| Practicing physicians | South-central region | -0.057                       | 531983                              | 0.086              | 1.000   |
|                       | Southwest region     | -0.076                       | 240737                              | 0.113              | 1.000   |
|                       | Northwest region     | -0.045                       | 149050                              | 0.155              | 1.000   |
|                       | National             | -0.060                       | 1846650                             | 0.134              | 1.000   |
|                       | Northern region      | -0.066                       | 120603                              | 0.154              | 1.000   |
|                       | Northeast region     | -0.045                       | 66952                               | 0.147              | 1.000   |
|                       | Eastern region       | -0.067                       | 273616                              | 0.247              | 1.000   |
|                       | South-central region | -0.054                       | 257797                              | 0.174              | 1.000   |
|                       | Southwest region     | -0.061                       | 120798                              | 0.081              | 1.000   |
|                       | Northwest region     | -0.056                       | 58206                               | 0.247              | 1.000   |
| Registered nurses     | National             | -0.060                       | 897472                              | 0.167              | 1.000   |
|                       | Northern region      | -0.091                       | 47372.612                           | 0.079              | 1.000   |

| Project | Region               | Development coefficients $a$ | Endogenous control gray numbers $u$ | Test statistic $C$ | P-value |
|---------|----------------------|------------------------------|-------------------------------------|--------------------|---------|
|         | Northeast region     | -0.069                       | 33975.618                           | 0.089              | 1.000   |
|         | Eastern region       | -0.089                       | 154472.818                          | 0.191              | 1.000   |
|         | South-central region | -0.094                       | 137818.791                          | 0.126              | 1.000   |
|         | Southwest region     | -0.126                       | 56342.284                           | 0.064              | 1.000   |
|         | Northwest region     | -0.067                       | 39943.428                           | 0.070              | 1.000   |
|         | National             | -0.005                       | 134593.657                          | 0.120              | 1.000   |

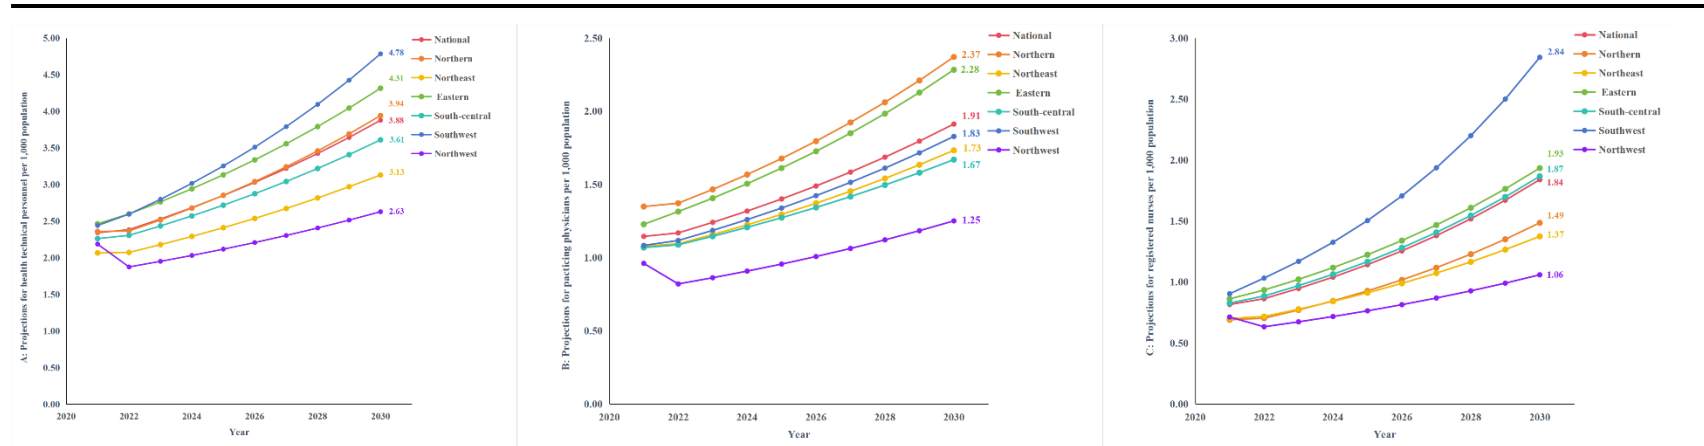

164 **Fig. 7** Projections of HR for PHC per 1000 capita from 2022-2023. **A, B,** and **C** show the projections of health technical personnel, practicing physicians, registered nurses respectively from  
165 2022-2023

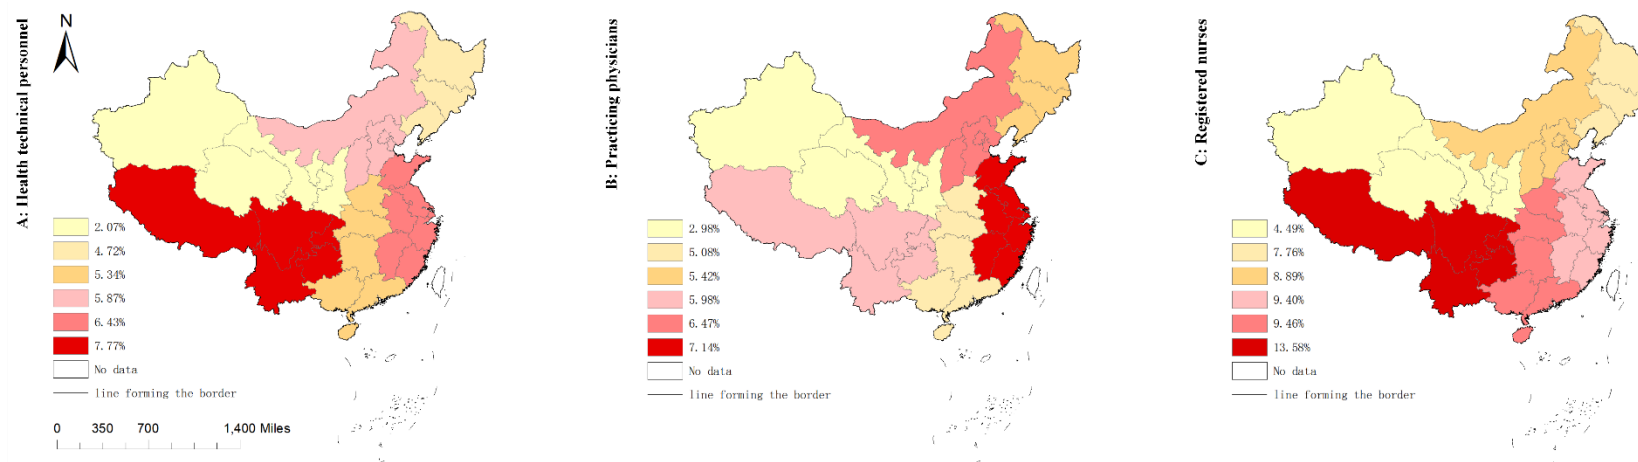

166

167 **Fig. 8** Projected average rate of growth of HR for PHC per 1,000 population from 2021 to 2030

## 168 4 Discussions

169 The development of the volume of HR for PHC has been given a stronger boost with the release of CHC in 2016. However, there are differences in the amount of resources  
170 allocated and the average rate of growth for resource between regions, and we find that such differences seem to be closely related to the level of economic income and the  
171 level of regional implementation of CHC. In the results based on a three-stage fairness analysis of allocation for HR of PHC, the outcomes of the G firstly tell us that these

172 resources are generally equitably allocated by population, and that although inequality increased a bit in some areas between 2012 and 2016, it declined and became more  
173 equitable than in the past during the period of 2016 to 2020, similar results can be found in T. The effects of CHC are not always immediate but have a certain lag, this is  
174 because the policies have been continuously improved and become clearer in subsequent years, for example, the government released the Guiding Opinions on Promoting the  
175 Construction and Development of Healthcare Consortia in 2017 [31], followed by the Work Program for Comprehensive Performance Assessment of Healthcare Consortia  
176 (Trial) in 2018 [32], and Measures for the Management of Healthcare Consortia (Trial) in 2020 and so on [33]. These policies have helped localities to continuously clarify the  
177 national requirements and measures for the construction of regional healthcare consortia, so their implementation of the policies has become more and more effective, and the  
178 influence of CHC on facilitating the equity of allocation of HR in PHC has also been gradually revealed in this process. G also demonstrates the problem that the northeast and  
179 northwest regions were not trending toward more equitable allocation of HR in PHC as other regions were, on the contrary, there was an upward trend of G in these two regions  
180 after 2016. This may be relevant to the economic income level of the regions as well as the level of policies implemented. By observing at the GDP per capita of the regions of  
181 northwest and northeast in 2021, the number of healthcare consortium pilot sites that both regions had in 2019, and the number of healthcare consortia rated as excellent that  
182 they had in 2021, both regions were worse than regions with declining inequality trends, such as regions in southwest, south-central, and eastern.

183 In the analysis of T, in the second part, a further search for the root of inequality is performed. It can be found that the inequality in the total allocation of HR for PHC mainly  
184 from intra-region, specifically eastern region is found to contribute more to the inequality in the allocation of health technical personnel and practicing physicians, and northern

185 region is found to contribute more to the inequality in the allocation of registered nurses. By analyzing the allocation of HR for PHC per 1,000 capita in each province of the  
186 six regions in 2021, it can be noticed that eastern and northern regions contributed more to the inequality in the distribution of resources is because these two regions include  
187 both resource-rich provinces and that with fewer resources, i.e., Jiangxi Province located in the eastern region had fewer health technicians and practicing physicians per 1,000  
188 capita than other provinces in the same district, as does Hebei Province in northern region in terms of registered nurses per 1,000 capita. In 2021, Jiangxi Province and Hebei  
189 Province ranked 15th and 27th respectively in terms of GDP per capita in China, while they both ranked last in terms of GDP per capita in their respective regions.

190 We summarize the phenomena fed back from the analyses of G and T and argue that the allocation of HR for PHC and the equity of its configuration may be affected by both  
191 the level of CHC implementation and level of income of the local economy. One potential inference that has been made is that the income level of the economy impacts the  
192 total amount of health resources which in turn influences the effectiveness of implementation in policies of CHC which in turn affects the equity of allocation in HR of PHC.

193 According to previous studies, the allocation of health resources is significantly and positively associated with the level of economic income [34], higher-income regions have  
194 more financial resources than lower-income regions that can be invested in promoting a more optimized allocation of physical and human resources for health [35], while the  
195 human, physical, and financial resources of health collectively form the basis for efficient implementation of the policies in CHC. Based on this, a new question arises: Is it  
196 possible that the CHC will aggravate the polarization of HR for PHC in high-income and low-income areas, leading to an increase in the level of inequality?

197 In order to clarify the above issues, the CI in the third step was performed. In the outcomes of the CI, overall HR in PHC were more inclined to be allocated to higher income



198 areas, but after the implementation of the CHC in 2016, the concentration curve did not expand outward but converged inward towards the absolute equity line, which means  
199 that the CHC policy did not exacerbate the degree of differentiation between low-income and high-income areas in terms of inequality in the allocation of human resources in  
200 PHC, on the contrary made it has reduced the degree of differentiation. However, we are not sure if the opposite is likely to happen in the future.

201 In the projections of HR for PHC per 1,000 capita from 2021 to 2030 for the GM(1,1) model with base data from 2012 to 2021, the number of resources will increase further  
202 and the average rate of growth comparing 2012 to 2021 for the country as a whole and for most regions from 2021 to 2030 has also accelerated, however, the northwest region's  
203 average rate of growth has slowed and decreases. In 2021, the average difference in the amount of resources between the regions with the best allocation of resources and the  
204 regions with the worst allocation of resources is 0.27, but if the current level of development continues, the difference between them will rise to 1.69 by 2030, which seems to  
205 indicate that the differences in the distribution of resources between regions are widening. Since the prediction result of the GM (1, 1) model is a natural change without  
206 considering external influences [19], in fact, the allocation of HR in PHC will be interfered by complex external factors such as economy, policy, population, public health  
207 emergencies [36,37], etc., so our prediction results may not be accurate but it serves as a reminder that it is necessary for the government to pay attention to the CHC's long-  
208 term impact on the inequality of the allocation of HR for PHC.

209 Four models of healthcare consortiums were proposed in CHC, they are urban hospital groups, rural healthcare associations, cross-regional specialist alliances and remote area  
210 tele-collaboration networks, The objective of the first two is to promote the vertical flow of resources within the region, while the latter two emphasize more on improving the

211 allocation of health care resources and the quality of health care services through the horizontal assistance of resource-rich regions with a higher level of health care to resource-  
212 poor regions like the northwest regions [13]. A retrospective study noted that the healthcare consortium models enhanced health outputs and health outcomes [38]. In this study,  
213 we noticed is the effect of the CHC in improving the allocation and equity of HR in PHC within the respective independent districts, but its impact on reducing disparities  
214 between regions is not noticeable, as it does not significantly help areas with a low allocation of resources to become as more resourced as areas with a high allocation.  
215 Based on the above conclusions, it is certain that CHC and its series of sub-policies are of great practical value in achieving improvements in the allocation of human resources  
216 for primary health care and their equity in China. It is therefore to be hoped that what the government may consider is to take a long-term view in monitoring the impact of  
217 CHC on the allocation of resources to primary health care and the equity of that, and to pay close attention in a nuanced manner to the effects of the implementation of the  
218 policy in the regions of different levels of economic income. Because, as the philosophical saying goes, "quantitative change leads to qualitative change", China's health care  
219 system is a complex system that needs to serve a population of 1.4 billion people, and any minor discrepancies that are not emphasized may in the future be a hidden danger  
220 that worsens the allocation of HR for PHC and its equity, which could potentially spill over into the inequality of the population's health. For the next phase of policy, we  
221 suggest that more emphasis should be placed on how to increase the amount of HR allocated to PHC in the backward regions. So how to attract more talents for the backward  
222 regions? This may give full play to the advantages of the horizontal assistance model proposed by CHC, whereby the assisted region provides financial resources and policy  
223 support, the hospitals that provide assistance export material resources such as medical technology, learning platforms, hospital staffing, etc. and play a well-known role to

224 attract more HR for PHC to resource-poor regions through the establishment of branch hospitals or HR programs.

225 This study is concerned with analyzing the effects of the implementation of policies of CHC from the perspective of the allocation of the number of PHC human resources by  
226 population and its equity, and does not explore the quality of resources and population needs, among other perspectives. At the same time, although we considered the impact  
227 of regional economic income and the effectiveness of regional implementation for CHC on the allocation and equity of HR in PHC, we did not take into account other social  
228 factors such as the health status of regional populations and educational attainment, thus may have some limitations. The prediction of GM (1, 1) is executed without considering  
229 the external factors, so the real result may be somewhat different from the prediction when the external factors change.

## 230 **5 Conclusions**

231 Since the implementation of the CHC, the allocation of HR for PHC in China has improved. Through the three stages of inequality analysis, we conclude that the  
232 inequality of HR for PHC in China is low, however, the inequality between regions has not been eliminated. We draw the inference that the level of economic income  
233 affects the total amount of health resources, which in turn affects the effectiveness of CHC's implementation, which in turn affects the allocation of HR for PHC and  
234 its equity in China, but of course this interlocking chain of influences needs to be supported by more empirical studies. The GM (1, 1) model shows a growing trend of  
235 HR for PHC, but there are differences in the average rate of growth between regions, and the differences in the level of resource allocation may widen in the future.  
236 We propose government to take a long-term view to monitor the impact of CHC on the allocation of HR for PHC and its equity, with particular attention to the impact

237 on different economic income regions. At the end we raise an idea to the government about playing the role of the CHC horizontal healthcare consortiums on enhancing  
238 HR for PHC in less resourced areas.

239 **Author Contributions:** Conceptualization, S.L.; methodology, S.L.; software, S.L. and Z.L.; validation, S.Z; formal analysis, S.L.; resources, S.Z.; data curation, S.L. and  
240 Z.L.; writing-original draft preparation, S.L.; writing-review and editing, S.L.; visualization, S.L. and Z.L.; supervision, S.Z.; project administration, S.Z. All authors have read  
241 and agreed to the published version of the manuscript.

242 **Informed Consent Statement:** Not applicable.

243 **Availability of data and materials:** The datasets used and/or analyzed during the current study are available from the corresponding author on reasonable request.

244 **Funding:** The study was supported by grants from Major Project sponsored by Fujian New Think Tank (21MZKB10), Fujian Provincial Department of Education  
245 Project(JAS20113), and Fujian University of Traditional Chinese Medicine First-class Undergraduate Course Project (Minzhong Medical Education [2021] No.46 and  
246 Minzhong Medical Education[2022] No.47), Study on the Practice and Optimization of the Hierarchical Diagnosis and Treatment System of Fujian Characteristic County  
247 Medical Community (2023R0130).

248 **Institutional Review Board Statement:** The data are publicly available data. Therefore, it was considered an exempt category.

249 **Conflicts of Interest:** The author has stated explicitly that there are no conflicts of interest in connection with this article.

250 **Ethical approval:** Not required.

## 251 **References**

- 252 1. Liu W, Liu Y, Twum P, Li S. National equity of health resource allocation in China: data from 2009 to 2013. *Int J Equity Health*. 2016;15:68. Doi: 10.1186/s12939-016-0357-1.
- 253 2. Mackenbach JP, Stirbu I, Roskam AJ, Schaap MM, Menvielle G, Leinsalu M, Kunst AE; European Union Working Group on Socioeconomic Inequalities in Health. Socioeconomic  
254 inequalities in health in 22 European countries. *N Engl J Med*. 2008;358(23):2468-81. Doi: 10.1056/NEJMsa0707519.
- 255 3. Dickman SL, Himmelstein DU, Woolhandler S. Inequality and the health-care system in the USA. *Lancet*. 2017;389(10077):1431-1441. Doi: 10.1016/S0140-6736(17)30398-7.
- 256 4. Cogburn CD. Culture, Race, and Health: Implications for Racial Inequities and Population Health. *Milbank Q*. 2019;97(3):736-761. Doi: 10.1111/1468-0009.12411.
- 257 5. Qiu L, Yang L, Li H, Wang L. The impact of health resource enhancement and its spatiotemporal relationship with population health. *Front Public Health*. 2023;10:1043184. Doi:  
258 10.3389/fpubh.2022.1043184.
- 259 6. Kruk ME, Porignon D, Rockers PC, Van Lerberghe W. The contribution of primary care to health and health systems in low- and middle-income countries: a critical review of major primary  
260 care initiatives. *Soc Sci Med*. 2010;70(6):904-11. Doi: 10.1016/j.socscimed.2009.11.025.
- 261 7. WHO. Primary health care: now more than ever. Geneva: World Health Organization; 2008.
- 262 8. Bhutta ZA, Ali S, Cousens S, Ali TM, Haider BA, Rizvi A, et al. Alma-Ata: rebirth and revision 6. Interventions to address maternal, newborn, and child survival: what difference can

- 263 integrate primary health care strategies make? *Lancet*. 2008; 372:972–89.
- 264 9. Li X, Lu J, Hu S, Cheng KK, De Messner J, Meng Q, Mossialos E, Xu DR, Yip W, Zhang H, Krumholz HM, Jiang L, Hu S. The primary health-care system in China. *Lancet*.  
265 2017;390(10112):2584-2594. Doi: 10.1016/S0140-6736(17)33109-4.
- 266 10. Wang H, Xu T, Xu J. Factors contributing to high costs and inequality in China's health care system. *JAMA*. 2007;298(16):1928-30. Doi: 10.1001/jama.298.16.1928.
- 267 11. State Council of China. Opinions of the Deepening Medical and Health System Reform. 2009. <http://qikan.cqvip.com/Qikan/Article/Detail?id=67889066504848574852484851>. Accessed 5  
268 April 2024.
- 269 12. State Council of China. Guiding Opinions on Promoting the Construction of a Graded Diagnosis and Treatment System. 2015, No. 70. [https://www.gov.cn/zhengce/content/2015-  
270 09/11/content\\_10158.htm](https://www.gov.cn/zhengce/content/2015-09/11/content_10158.htm). Accessed 5 April 2024.
- 271 13. National Health Commission of the People's Republic of China. Guiding Opinions on Carrying Out Pilot Construction of Healthcare Consortia. 2016, No. 75.  
272 <http://www.nhc.gov.cn/yzygj/s3594q/201701/4a39ec35c70a4899b3e415b51e821464.shtml>. Accessed 5 April 2024.
- 273 14. Wang Y, Li Y, Qin S, Kong Y, Yu X, Guo K, Meng J. The disequilibrium in the distribution of the primary health workforce among eight economic regions and between rural and urban  
274 areas in China. *Int J Equity Health*. 2020;19(1):28. Doi: 10.1186/s12939-020-1139-3.
- 275 15. Dong E, Liu S, Chen M, Wang H, Chen LW, Xu T, Wang T, Zhang L. Differences in regional distribution and inequality in health-resource allocation at hospital and primary health centre

- 276 levels: a longitudinal study in Shanghai, China. *BMJ Open*. 2020;10(7):e035635. Doi: 10.1136/bmjopen-2019-035635.
- 277 16. Zhang Y, Wang Q, Jiang T, Wang J. Equity and efficiency of primary health care resource allocation in mainland China. *Int J Equity Health*. 2018;17(1):140. Doi: 10.1186/s12939-018-  
278 0851-8.
- 279 17. Qi F, Barragan D, Rodriguez MG, Lu J. Evaluating spatial accessibility to COVID-19 vaccine resources in diversely populated counties in the United States. *Front Public Health*.  
280 2022;10:895538. Doi: 10.3389/fpubh.2022.895538.
- 281 18. Boniol M, Kunjumen T, Nair TS, Siyam A, Campbell J, Diallo K. The global health workforce stock and distribution in 2020 and 2030: a threat to equity and 'universal' health coverage?  
282 *BMJ Glob Health*. 2022;7(6):e009316. Doi: 10.1136/bmjgh-2022-009316.
- 283 19. Kou R, Mei K, Bi Y, Huang J, Yang S, Chen K, Li W. Equity and trends in general practitioners' allocation in China: based on ten years of data from 2012 to 2021. *Hum Resour Health*.  
284 2023;21(1):61. Doi: 10.1186/s12960-023-00841-5.
- 285 20. National Health Commission of the People's Republic of China. *China Health Statistics Yearbook*. [http://www.nhc.gov.cn/mohwsbwstjxxzx/tjzxtjsj/tjsj\\_list.shtml](http://www.nhc.gov.cn/mohwsbwstjxxzx/tjzxtjsj/tjsj_list.shtml). Accessed 6 April 2024.
- 286 21. National Bureau of Statistics. *China Statistical Yearbook*. [http://www.nhc.gov.cn/mohwsbwstjxxzx/tjzxtjsj/tjsj\\_list.shtml](http://www.nhc.gov.cn/mohwsbwstjxxzx/tjzxtjsj/tjsj_list.shtml). Accessed 7 April 2024.
- 287 22. Williams RF, Doessel DP. Measuring inequality: tools and an illustration. *Int J Equity Health*. 2006;5:5. Doi: 10.1186/1475-9276-5-5.
- 288 23. Zhou Z, Su Y, Gao J, Campbell B, Zhu Z, Xu L, Zhang Y. Assessing equity of healthcare utilization in rural China: results from nationally representative surveys from 1993 to 2008. *Int J*

- 289 Equity Health. 2013;12:34. Doi: 10.1186/1475-9276-12-34.
- 290 24. Wagstaff A, Paci P, van Doorslaer E. On the measurement of inequalities in health. Soc Sci Med. 1991;33(5):545-57. Doi: 10.1016/0277-9536(91)90212-u.
- 291 25. Hyldgård VB, Johnsen SP, Sogaard R. Index-Based Inequality in Quality of Care: An Empirical Comparison of Apples and Pears. Clin Epidemiol. 2021;13:791-800. Doi:  
292 10.2147/CLEP.S311813.
- 293 26. Fan X, Zhang W, Guo Y, Cai J, Xie B. Equity assessment of the distribution of mental health beds in China: based on longitudinal data from 2011 to 2020. BMC Health Serv Res.  
294 2022;22(1):1453. Doi: 10.1186/s12913-022-08658-z.
- 295 27. Liu S, Forrest JY. Grey systems: theory and applications. Berlin: Springer Science Business Media; 2010.
- 296 28. Liu S, Forrest J, Yang Y. A brief introduction to grey systems theory. In: Proceedings of 2011 IEEE International conference on grey systems and intelligent services. IEEE, 2011: 1–9.
- 297 29. Yu Q, Yin W, Huang D, Sun K, Chen Z, Guo H, Wu D. Trend and equity of general practitioners' allocation in China based on the data from 2012-2017. Hum Resour Health. 2021 Feb  
298 15;19(1):20. Doi: 10.1186/s12960-021-00561-8.
- 299 30. Zhang S, Zhao M, Liu Z, Yang F, Lu B, Zhao Z, Gu K, Zhang S, Lei M, Zhang C, Wang C, Cai W. City-level population projection for China under different pathways from 2010 to 2100.  
300 Sci Data. 2023 Nov 17;10(1):809. Doi: 10.1038/s41597-023-02735-6.
- 301 31. State Council of China. Guiding Opinions on Promoting the Construction and Development of Healthcare Consortia. 2017, No. 32.



- 302 [https://www.gov.cn/gongbao/content/2017/content\\_5191699.htm](https://www.gov.cn/gongbao/content/2017/content_5191699.htm). Accessed 5 April 2024.
- 303 32. National Health Commission of the People's Republic of China. Work Program for Comprehensive Performance Assessment of Healthcare Consortia (Trial). 2018, NO. 26.
- 304 <http://www.nhc.gov.cn/yzygj/s3594q/201808/570358dbf0af41238f46bb89e4af538b.shtml>. Accessed 5 April 2024.
- 305 33. National Health Commission of the People's Republic of China. Measures for the Management of Healthcare Consortia (Trial). 2020, NO. 13.
- 306 <http://www.nhc.gov.cn/yzygj/s3594q/202007/62e9df95714741fa95f9074828848f05.shtml>. Accessed 5 April 2024.
- 307 34. Wu Q, Wu L, Liang X, Xu J, Wu W, Xue Y. Influencing factors of health resource allocation and utilisation before and after COVID-19 based on RIF-I-OLS decomposition method: a  
308 longitudinal retrospective study in Guangdong Province, China. *BMJ Open*. 2023;13(3):e065204. Doi: 10.1136/bmjopen-2022-065204.
- 309 35. Zhou M. Regional differences in health resource allocation: a longitudinal study in the Chengdu-Chongqing economic circle, China. *BMJ Open*. 2024;14(3):e082721. Doi: 10.1136/bmjopen-  
310 2023-082721.
- 311 36. Squires A, Uyei SJ, Beltrán-Sánchez H, Jones SA. Examining the influence of country-level and health system factors on nursing and physician personnel production. *Hum Resour Health*.  
312 2016;14(1):48. Doi: 10.1186/s12960-016-0145-4.
- 313 37. GBD 2019 Human Resources for Health Collaborators. Measuring the availability of human resources for health and its relationship to universal health coverage for 204 countries and  
314 territories from 1990 to 2019: a systematic analysis for the Global Burden of Disease Study 2019. *Lancet*. 2022;399(10341):2129-2154. Doi: 10.1016/S0140-6736(22)00532-3.

315 38. Wang X, Yang E, Zheng C, Yuan S. Effects of vertical integration on the healthcare system in China: a systematic review and meta-analysis. Health Policy Plan. 2024 Jan 9;39(1):66-79.

316 Doi: 10.1093/heapol/czad085.
